# Supplementary material for: Metformin attenuates osteoclast-mediated abnormal subchondral bone remodeling and alleviates osteoarthritis via AMPK/NF-κB/ERK signaling pathway
Source: PubMed Central journal article supplement (PMC8675877; doi:10.1371/journal.pone.0261127), 2021-12-16
Supplement: pone.0261127.s001.pdf [file pone.0261127.s001.pdf]

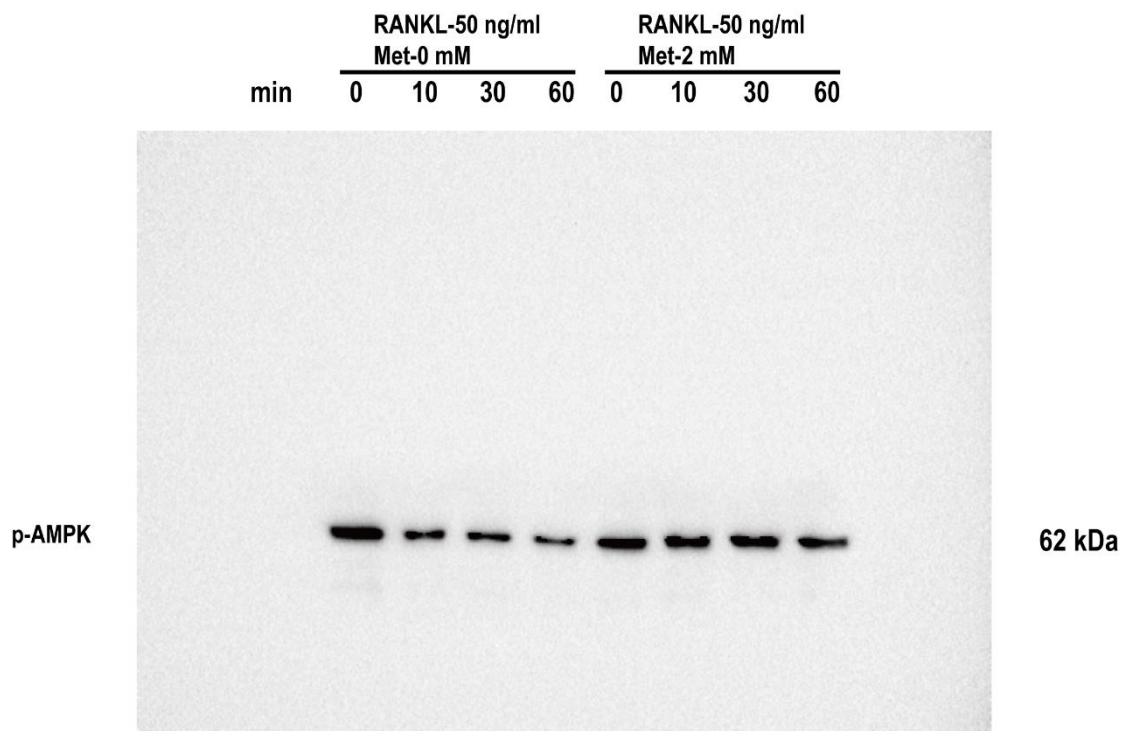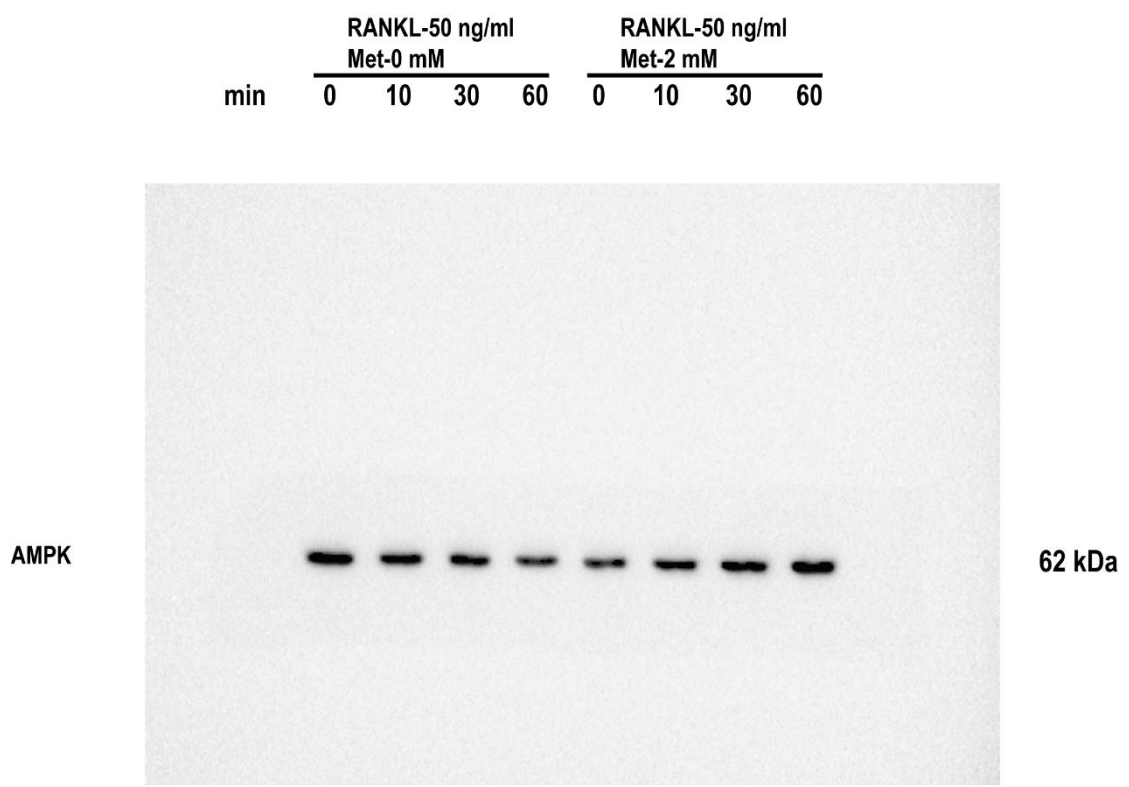

min                      RANKL-50 ng/ml                      RANKL-50 ng/ml  
                                 Met-0 mM                      Met-2 mM

---

                                 0    10    30    60                      0    10    30    60

$\beta$ -actin

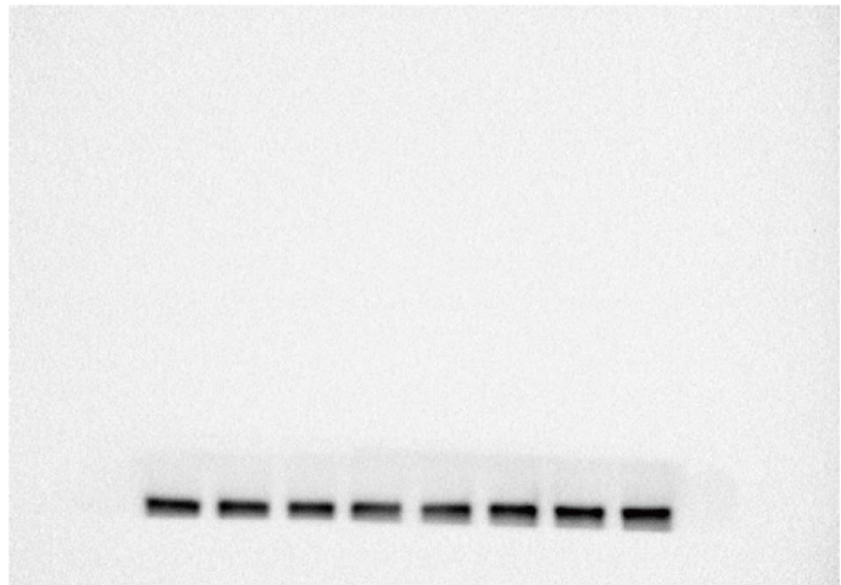

42 kDa

min                      RANKL-50 ng/ml                      RANKL-50 ng/ml  
                                 Met-0 mM                      Met-2 mM

---

                                 0    10    30    60                      0    10    30    60

I $\kappa$ B $\alpha$

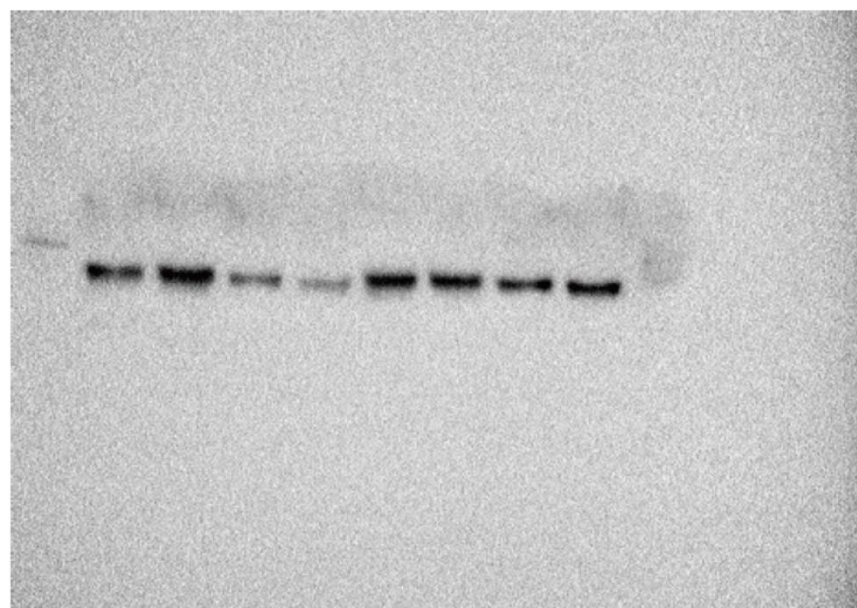

35 kDa

| min | RANKL-50 ng/ml<br>Met-0 mM |    |    |    | RANKL-50 ng/ml<br>Met-2 mM |    |    |    |
|-----|----------------------------|----|----|----|----------------------------|----|----|----|
|     | 0                          | 10 | 30 | 60 | 0                          | 10 | 30 | 60 |

NF- $\kappa$ B

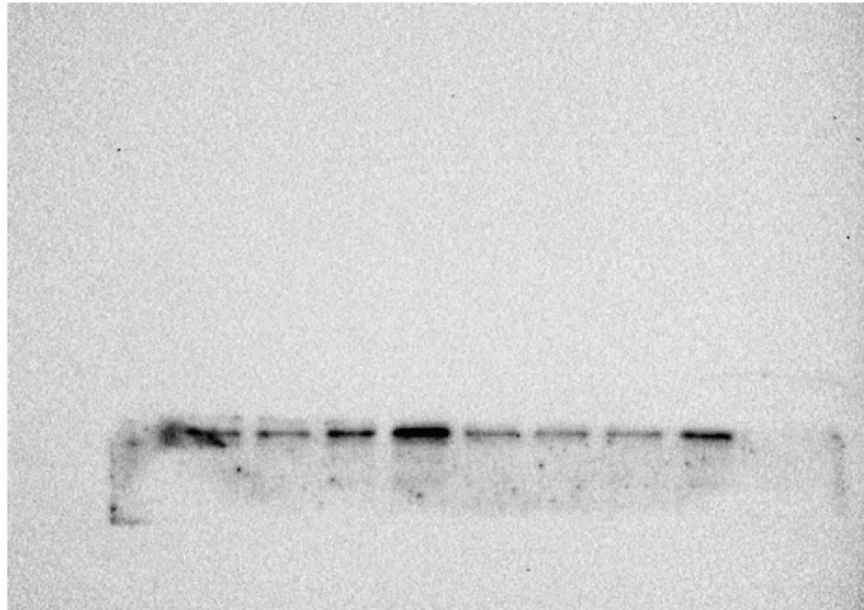

65 kDa

| min | RANKL-50 ng/ml<br>Met-0 mM |    |    |    | RANKL-50 ng/ml<br>Met-2 mM |    |    |    |
|-----|----------------------------|----|----|----|----------------------------|----|----|----|
|     | 0                          | 10 | 30 | 60 | 0                          | 10 | 30 | 60 |

$\beta$ -actin

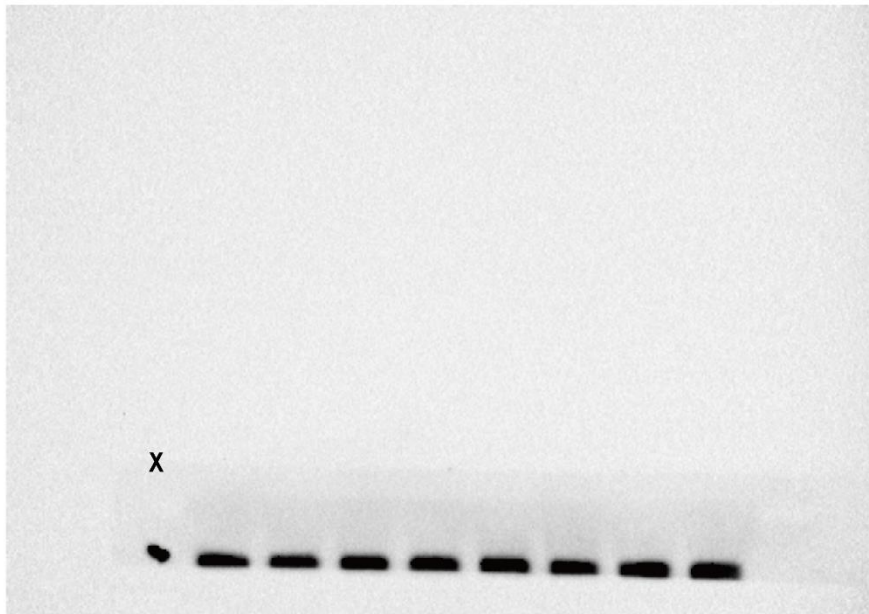

42 kDa

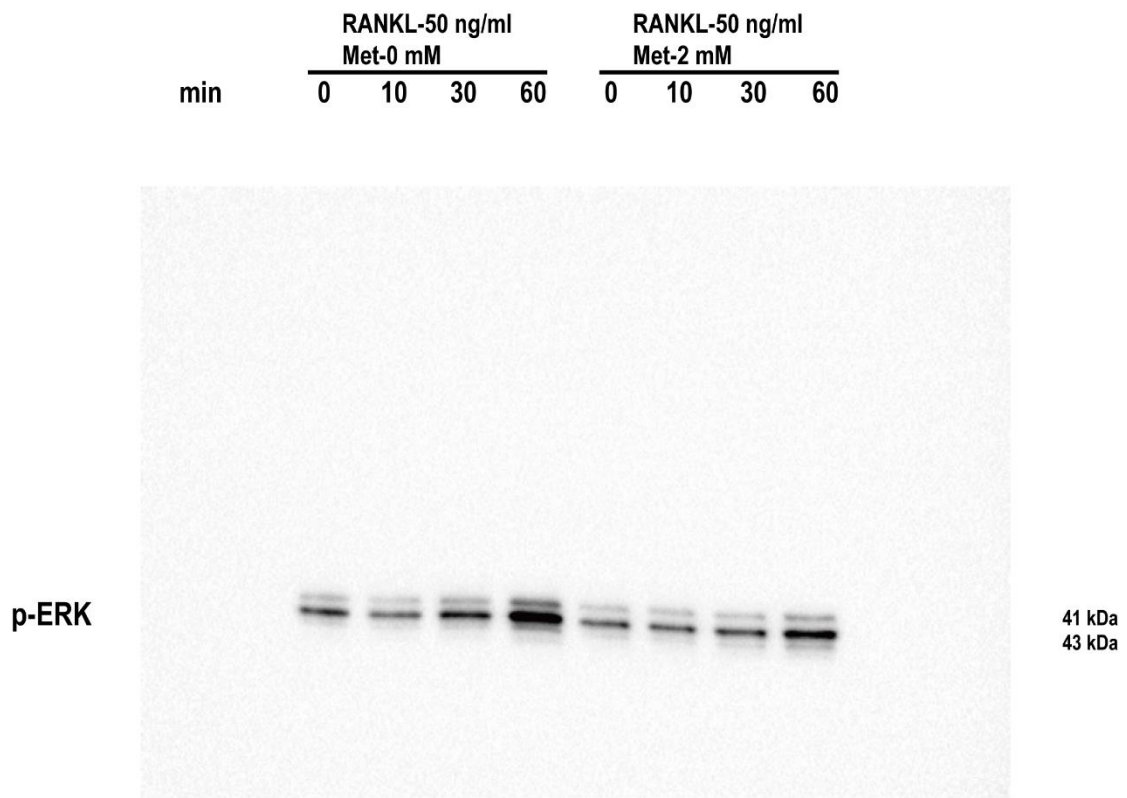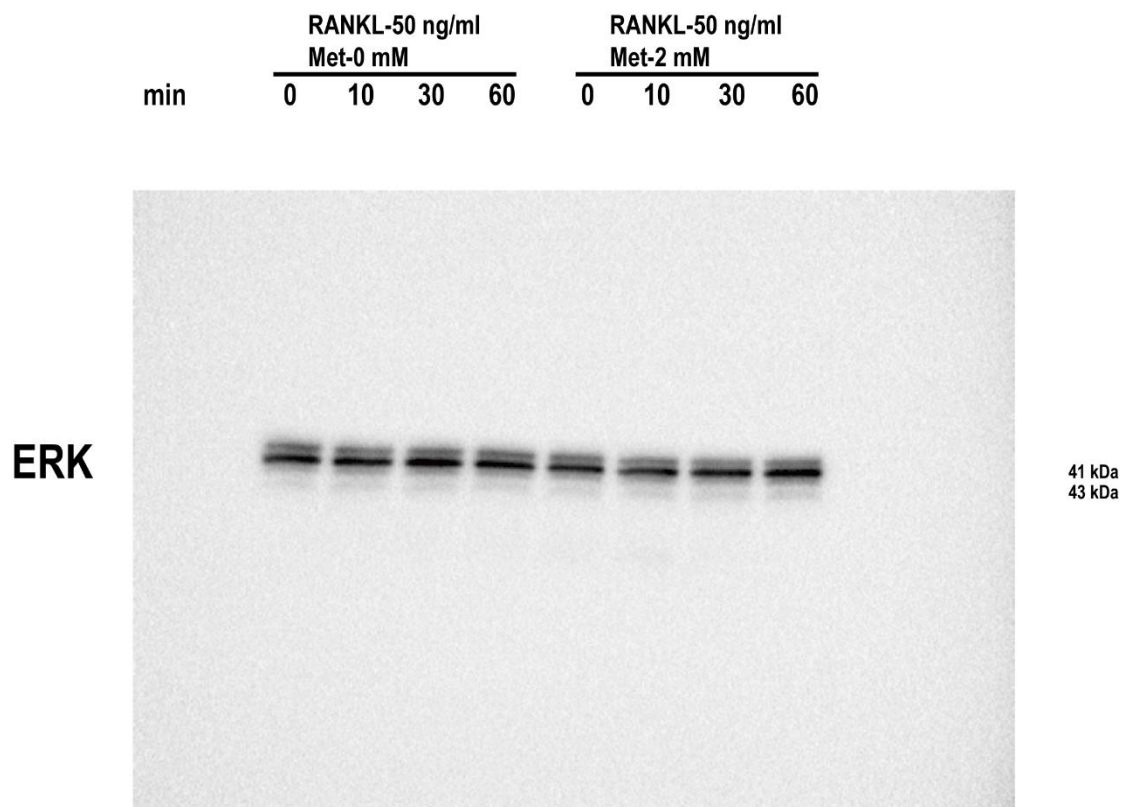

| min | RANKL-50 ng/ml<br>Met-0 mM |    |    |    | RANKL-50 ng/ml<br>Met-2 mM |    |    |    |
|-----|----------------------------|----|----|----|----------------------------|----|----|----|
|     | 0                          | 10 | 30 | 60 | 0                          | 10 | 30 | 60 |

p-JNK

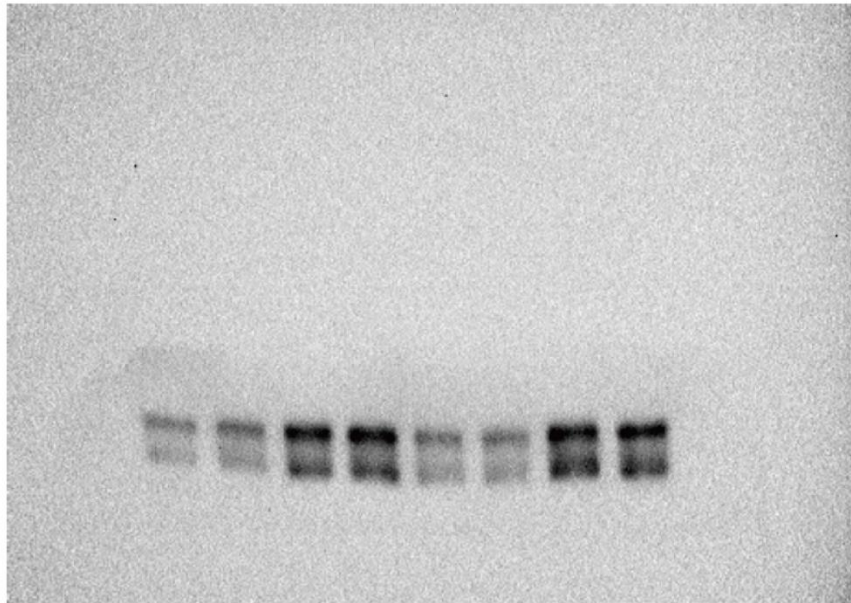

46 kDa  
54 kDa

| min | RANKL-50 ng/ml<br>Met-0 mM |    |    |    | RANKL-50 ng/ml<br>Met-2 mM |    |    |    |
|-----|----------------------------|----|----|----|----------------------------|----|----|----|
|     | 0                          | 10 | 30 | 60 | 0                          | 10 | 30 | 60 |

JNK

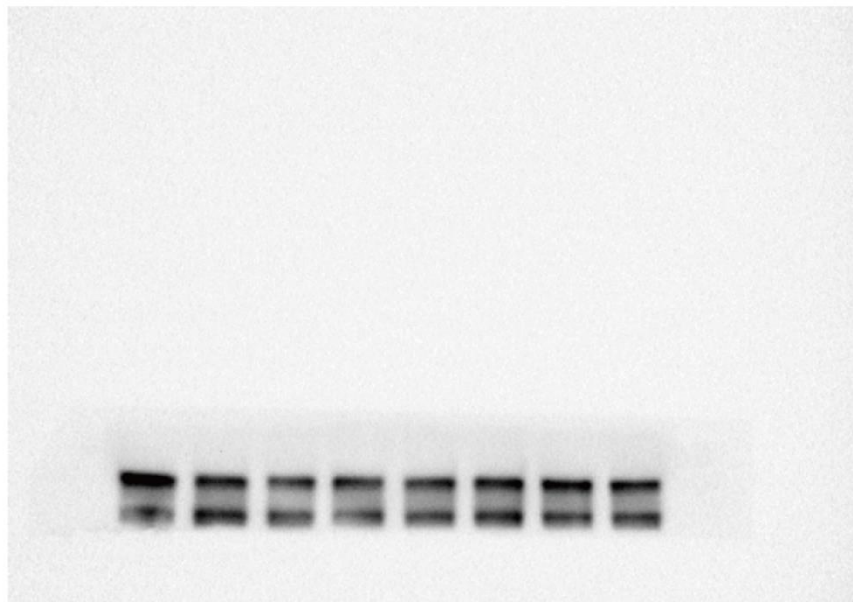

46 kDa  
54 kDa

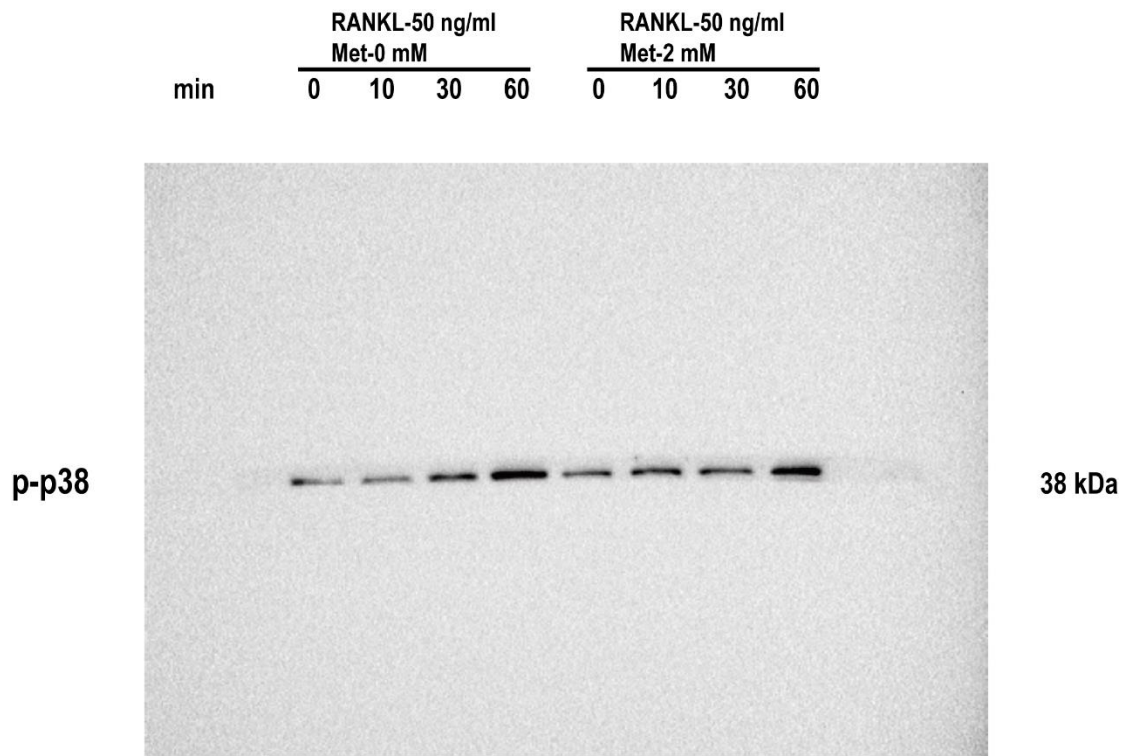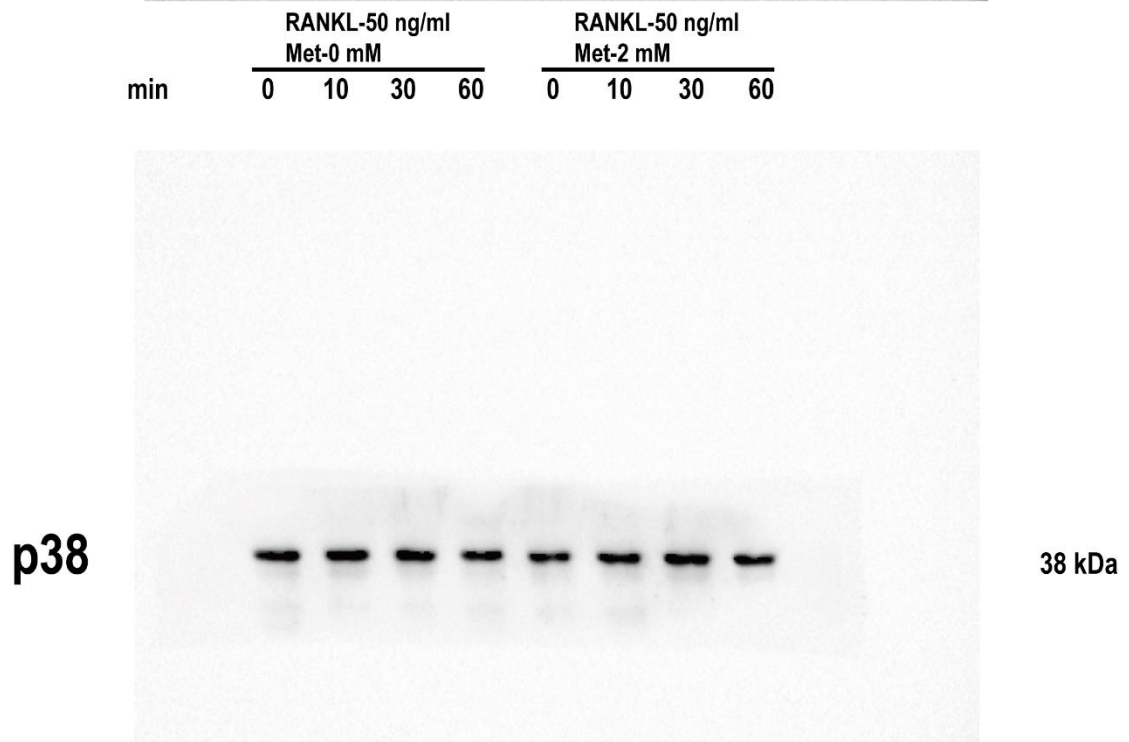

min                      RANKL-50 ng/ml                      RANKL-50 ng/ml  
                                 Met-0 mM                      Met-2 mM  
                                 0    10    30    60                      0    10    30    60

$\beta$ -actin

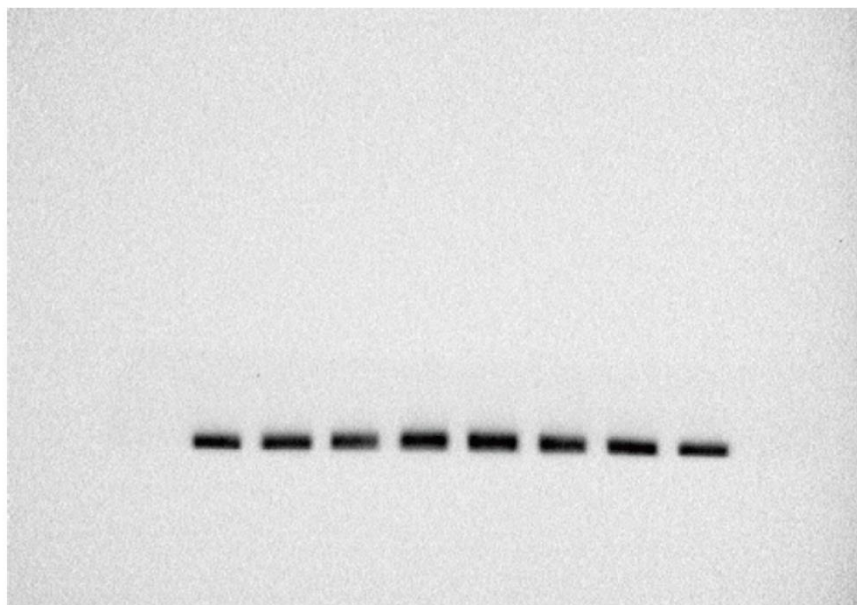

42 kDa
